# Supplementary material for: Transcriptome Sequencing in a Tibetan Barley Landrace with High Resistance to Powdery Mildew
Source: Hindawi journal article supplement (doi:10.1155/2014/594579), 2014-01-01
Supplement: f1 [file 594579.f1.pdf]

- 1    **Supplementray Table 1    Sample information.**
- 2    **Supplementray Table 2    Different gene expression (DGE) of each two samples.**
- 3    **Supplementray Figure 1    Barley leaves at six growth stages after infection (0 h, 24 h, 48 h, 72 h, 96**  
4        **h, and 120 h).**
- 5    **Supplementray Figure 2    Mean Quality Distribution of A (C0, TR130348).** The base position in reads  
6        is as the X-axis, and the mean Qphred is as the Y-axis.
- 7    **Supplementray Figure 3    Base Distribution of A (C0, TR130348).** The base position in reads is as the  
8        X-axis, and the percentage of ATGC base is as the Y-axis.
- 9    **Supplementray Figure 4    Gene depth distribution of A (C0, TR130348).** The relative position in gene  
10       is as X-axis, the number of reads is Y-axis.
- 11   **Supplementray Figure 5    Gene Saturation of A (C0, TR130348).**
- 12   **Supplementray Figure 6    Total DGEs from each sample was clustered.**
- 13

14 **Supplementary Table 1** Sample information.

| Accession no. | Sampling hour | Sample code | Group name |
|---------------|---------------|-------------|------------|
| TR130348      | 0             | C0          | A          |
| TR130349      | 24            | C24         | B          |
| TR130350      | 48            | C48         | C          |
| TR130351      | 72            | C72         | D          |
| TR130352      | 96            | C96         | E          |
| TR130353      | 120           | C120        | F          |

15

**Supplementary Table 2** Summary of differently expressed genes (DEG).

| Accession | A   | B   | C   | D  | E  |
|-----------|-----|-----|-----|----|----|
| B         | 103 |     |     |    |    |
| C         | 93  | 39  |     |    |    |
| D         | 44  | 42  | 49  |    |    |
| E         | 49  | 102 | 108 | 27 | 16 |
| F         | 73  | 29  | 36  | 21 |    |

16

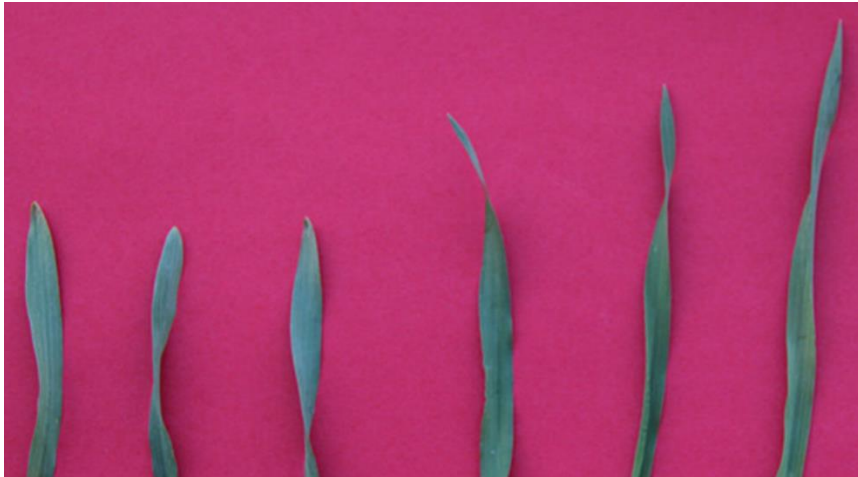

0 h      24 h      48 h      72 h      96 h      120 h

17

18 **Supplementary Figure 1**

19

20  
21

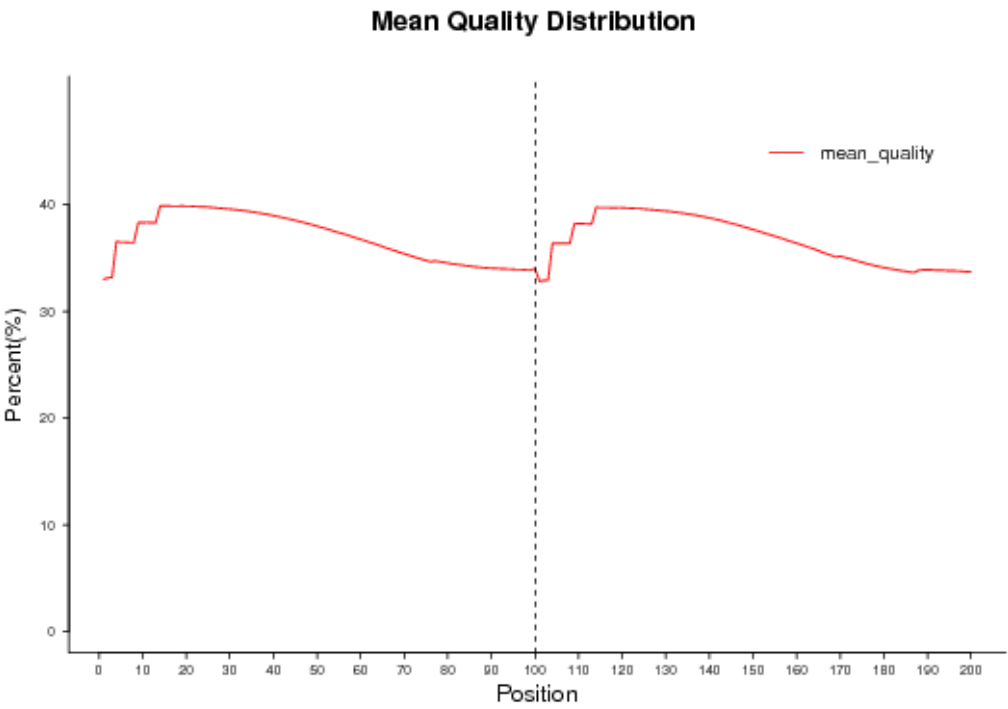

22

23 **Supplementary Figure 2**

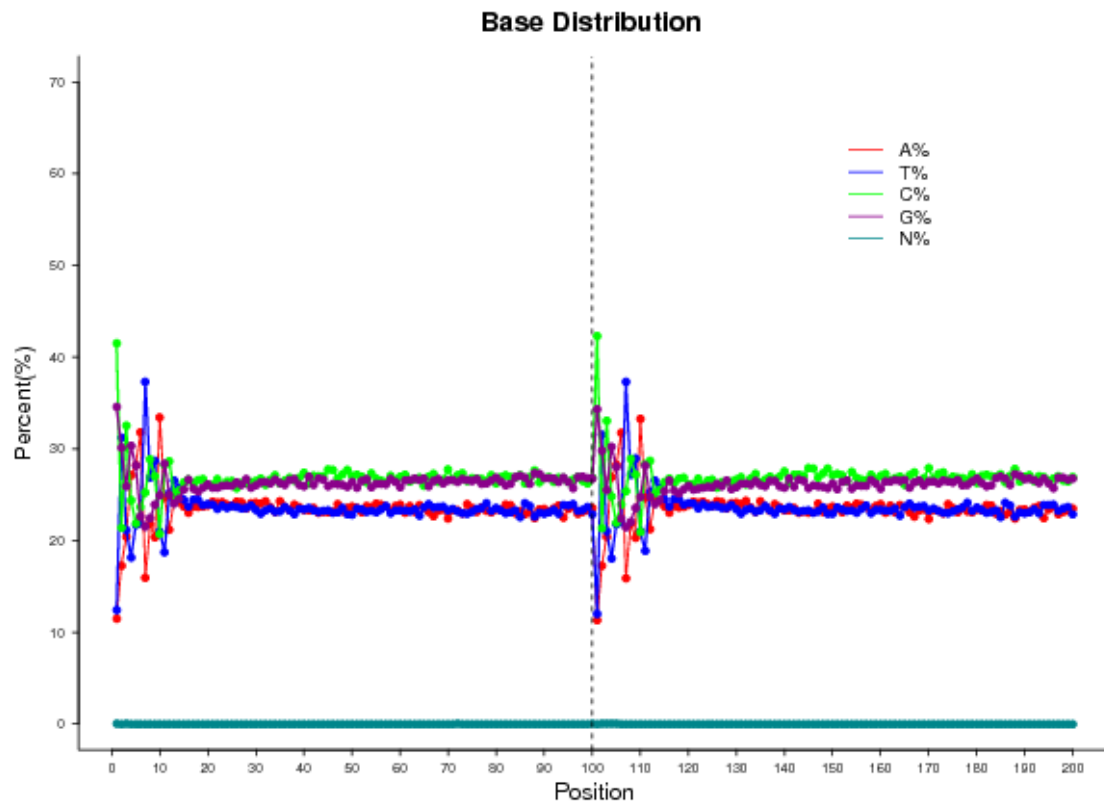

24

25 **Supplementary Figure 3**

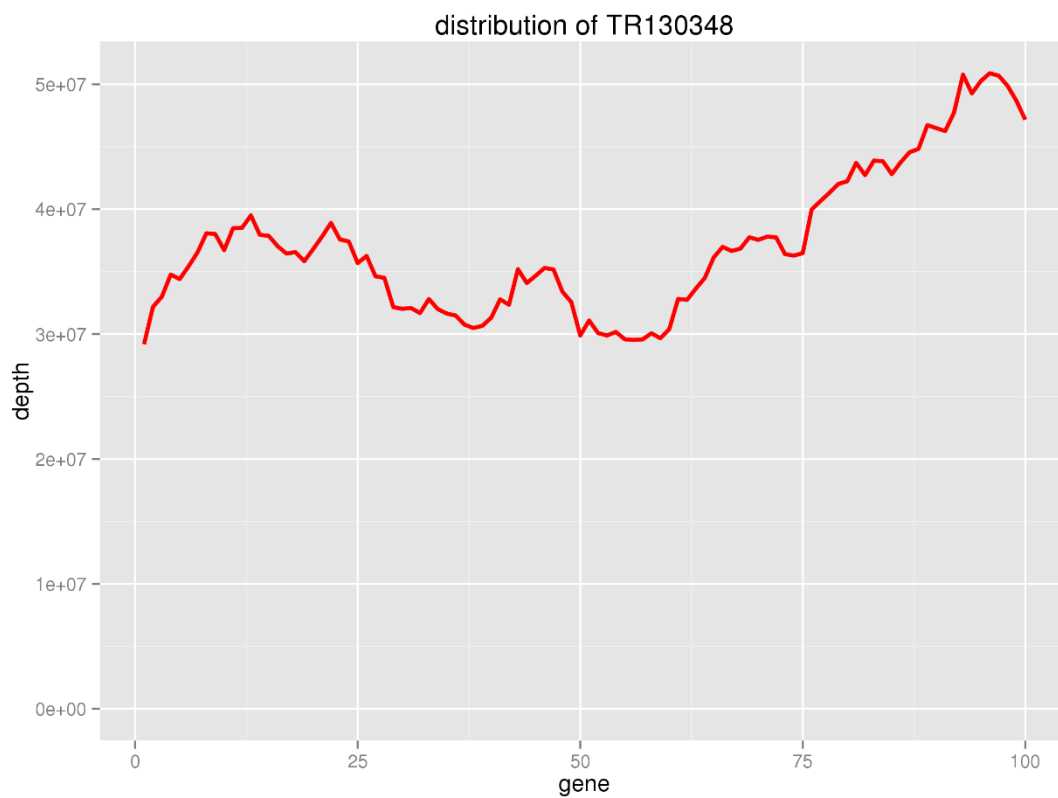

26

27 **Supplementary Figure 4**

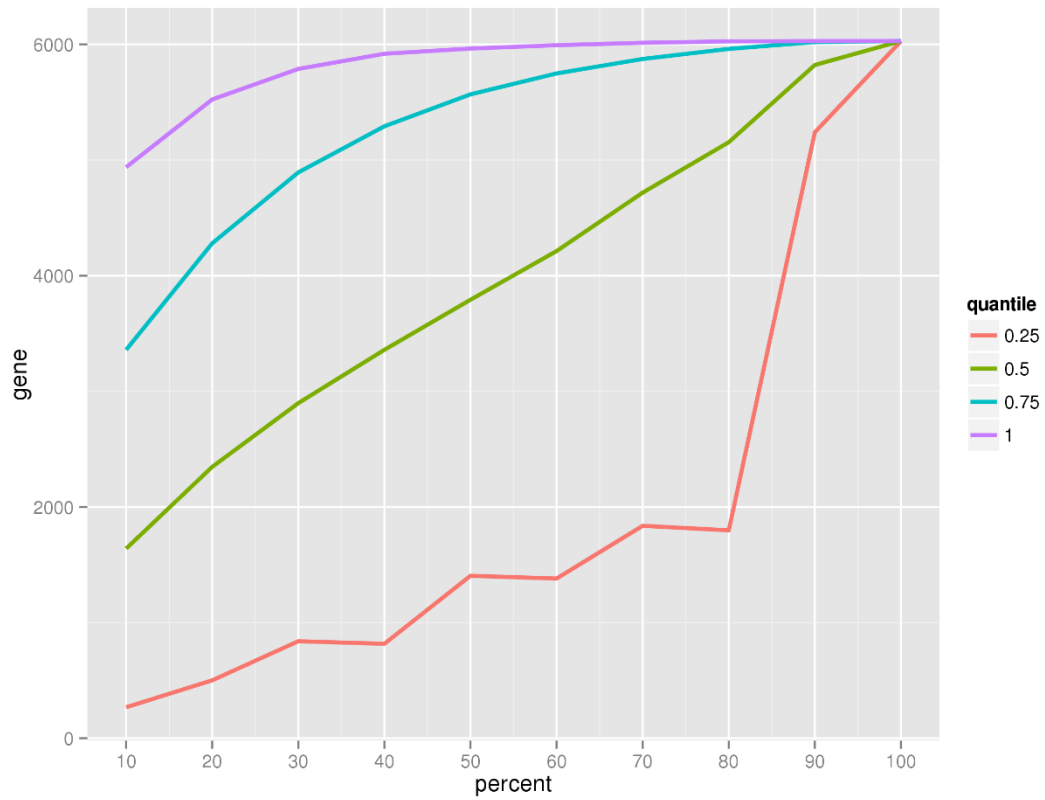

28

29 **Supplementary Figure 5**

30



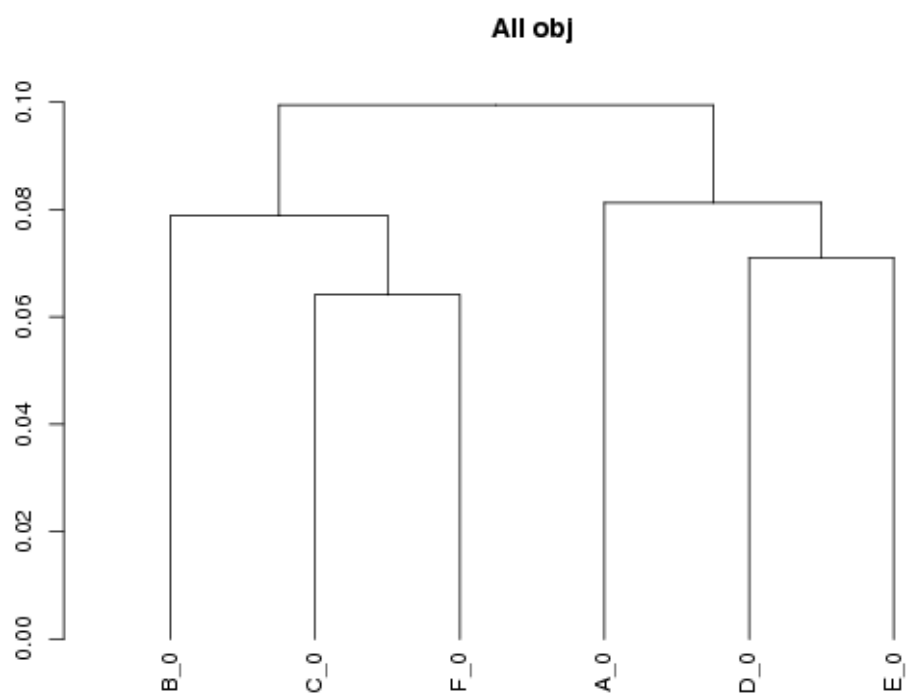

31

32 **Supplementary Figure 6**
